# Supplementary material for: Silver Nanoparticles Stable to Oxidation and Silver Ion Release Show Size-Dependent Toxicity In Vivo
Source: MDPI journal article supplement (doi:10.3390/nano11061516), 2021-06-08
Supplement: s1 [file s1]

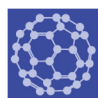

## Article

# Silver Nanoparticles Stable to Oxidation and Silver Ion Release Show Size-Dependent Toxicity In Vivo

Brittany Cunningham <sup>1</sup>, Arek E. Engstrom <sup>2</sup>, Bryan J. Harper <sup>1</sup>,  
Stacey L. Harper <sup>1,2,3</sup> and Marilyn R. Mackiewicz <sup>4,\*</sup>

<sup>1</sup> Department of Environmental and Molecular Toxicology, Oregon State University, Corvallis, OR, 97331 USA; cunningb@oregonstate.edu (B.C.); Bryan.Harper@oregonstate.edu (B.J.H.); Stacey.Harper@oregonstate.edu (S.L.H.)

<sup>2</sup> School of Chemical, Biological, and Environmental Engineering, Oregon State University, Corvallis, OR, 97331 USA; arek.engstrom@gmail.com

<sup>3</sup> Oregon Nanoscience and Microtechnologies Institute, Corvallis, OR, 97339 USA

<sup>4</sup> Department of Chemistry, Oregon State University, Corvallis, OR, 97331 USA

\* Correspondence: marilyn.mackiewicz@oregonstate.edu

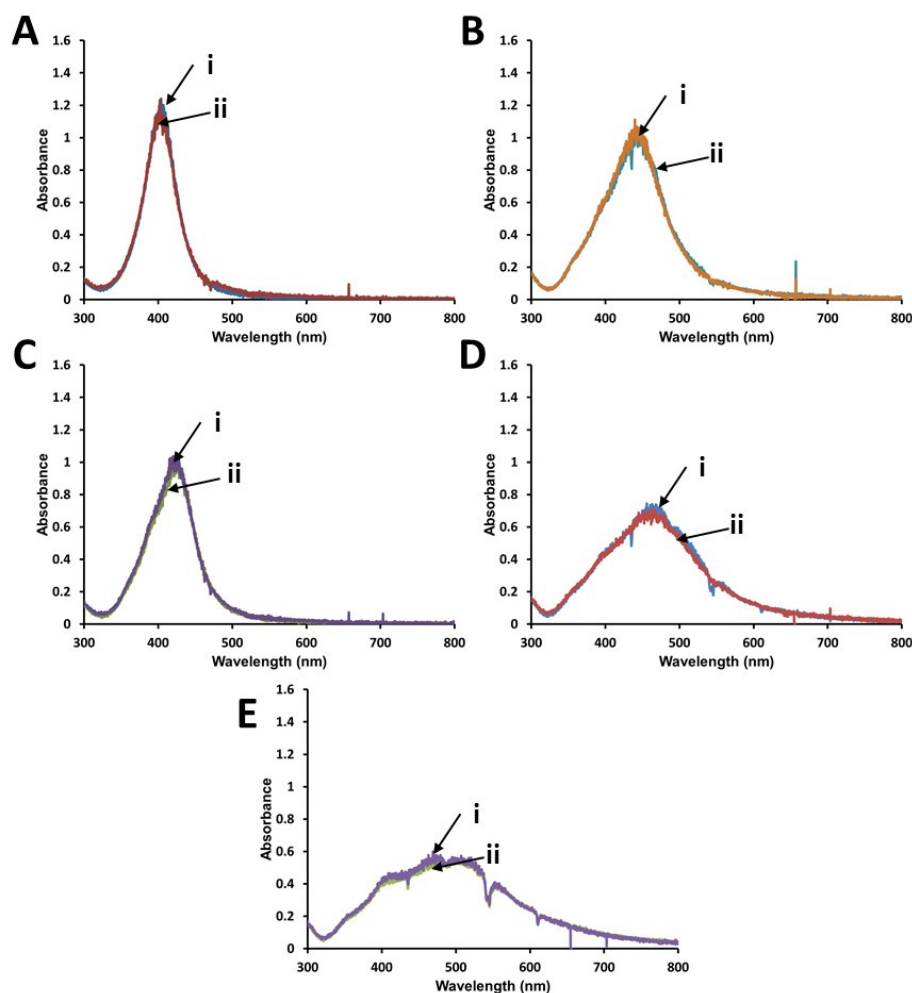

**Figure S1.** Representative UV-vis spectra of purified spherical Ag-SOA-PC-HT at the same concentration (6 mg Ag/L). **A)** 20 nm, **B)** 40 nm, **C)** 60 nm, **D)** 80 nm, and **E)** 100 nm nanoparticles **i)** before and **ii)** after exposure to KCN (6 mM) in water.

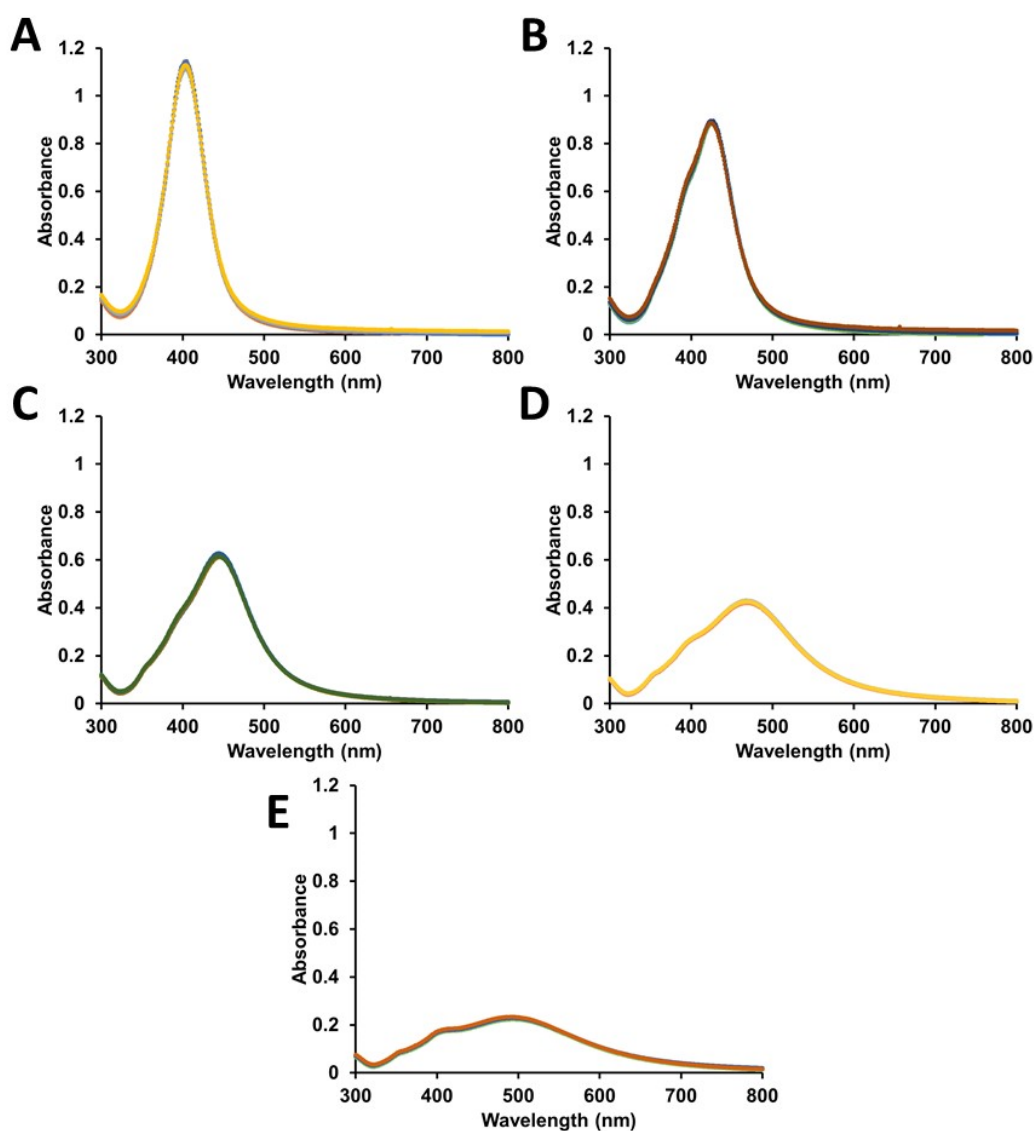

**Figure S2.** Representative |% change| in the O.D. of Ag-SOA-PC-HT nanoparticles **A)** 20 nm, **B)** 40 nm, **C)** 60 nm, **D)** 80 nm, and **E)** 100 nm nanoparticles at 1-day, 5 days, and 7 days post synthesis in FW.

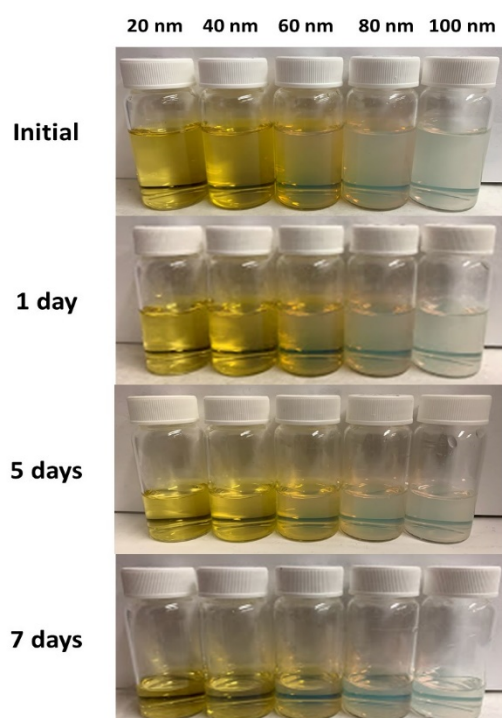

**Figure S3.** Photographs of the Ag-SOA-PC-HT nanoparticles (6 ppm) after initial synthesis, day 1, 5-days, and 7-days post synthesis in FW at 25 °C.

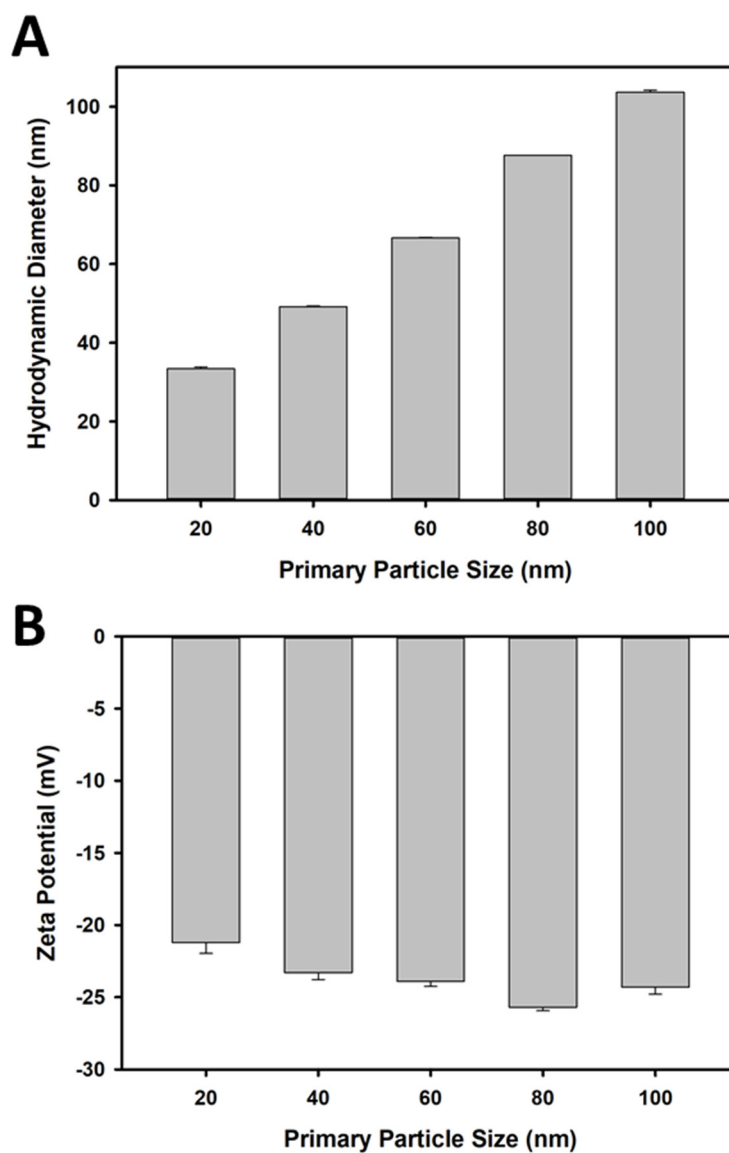

**Figure S4.** A) Hydrodynamic diameter and B) zeta potential of 20, 40, 60, 80 and 100 nm Ag-SOA-PC-HT nanoparticles at 12 mg Ag/L in fishwater.

**Table S1.** Properties of citrate-capped AgNP properties from manufacturer (NanoComposix, San Diego, CA).

| AgNP Size (nm) | HDD (nm) | Zeta (mV) | Particle Concentration (AgNPs/mL) | $\lambda_{\max}$ (nm) | OD <sub>max</sub> |
|----------------|----------|-----------|-----------------------------------|-----------------------|-------------------|
| 19.7 ± 3.6     | 23       | -41       | 4.9*10 <sup>11</sup>              | 392                   | 4.21              |
| 41 ± 5         | 44       | -50       | 5.4*10 <sup>10</sup>              | 417                   | 2.9               |
| 59 ± 6         | 64       | -51       | 1.8*10 <sup>10</sup>              | 438                   | 1.93              |
| 80 ± 9         | 85       | -52       | 7.3*10 <sup>9</sup>               | 463                   | 1.37              |
| 97 ± 13        | 101      | -51       | 4.2*10 <sup>9</sup>               | 485                   | 1.05              |

**Table S2.** Ag-SOA-PC-HT concentrations determined by ICP-MS.

| AgNP Size (nm) | Particle<br>Concentration (mg Ag/L) | Particle<br>Concentration (AgNPs/mL) |
|----------------|-------------------------------------|--------------------------------------|
| 20             | 32.98                               | $7.7 \times 10^{11}$                 |
| 40             | 37.78                               | $9.7 \times 10^{10}$                 |
| 60             | 41.37                               | $3.5 \times 10^{10}$                 |
| 80             | 42.01                               | $1.5 \times 10^9$                    |
| 100            | 59.71                               | $1.2 \times 10^{10}$                 |

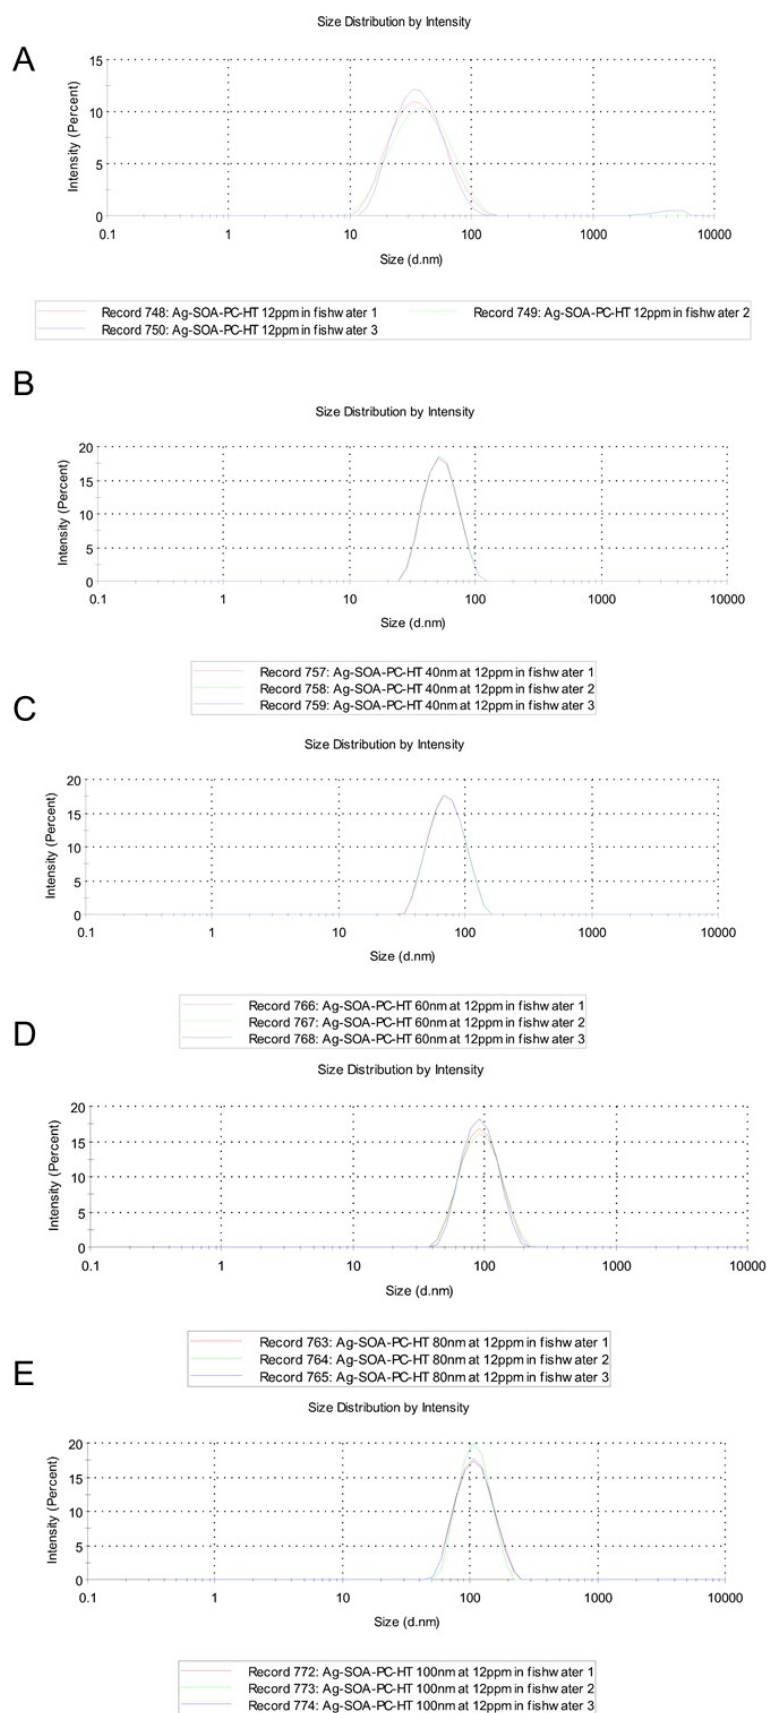

**Figure S5.** Size distribution by intensity curves for (A) 20 nm, (B) 40 nm, (C) 60 nm, (D) 80 nm, and (E) 100 nm Ag-SOA-PC-HT NPs.
